# Supplementary figures and images for: Ionic liquid-based electrolysis-deposition for modulating Pb crystal facets to boost CO2 electroreduction
Source: Royal Society of Chemistry journal article supplement (doi:10.1039/d2gc04622a), 2023-01-01

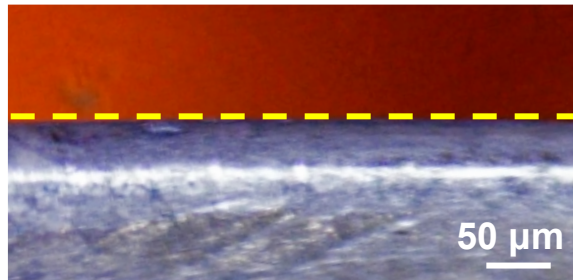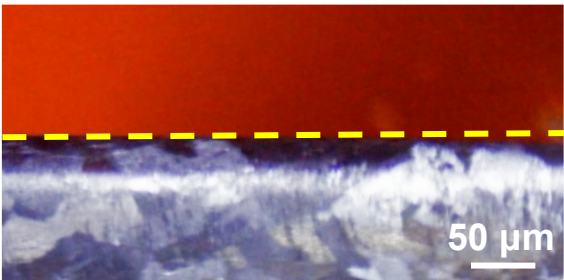

Supplement: d2gc04622a1.pdf [file d2gc04622a1.pdf]
